# Supplementary material for: Rapid quantitative 1H–13C two-dimensional NMR with high precision
Source: Royal Society of Chemistry journal article supplement (doi:10.1039/d1ra08423b), 2022-01-01
Supplement: d1ra08423b1.pdf [file d1ra08423b1.pdf]

## Rapid Quantitative $^1\text{H}$ - $^{13}\text{C}$ Two-Dimensional NMR With High Precision

Yu-Shan Wu,<sup>a</sup> Bai-Xiang Li,<sup>b</sup> Ying-Yun Long<sup>b\*</sup>

<sup>a</sup>Jilin Business and Technology College, Changchun 130507, China

<sup>b</sup>State Key Laboratory of Polymer Physics and Chemistry, Changchun Institute of Applied Chemistry,  
Chinese Academy of Sciences, Changchun 130022, China

---

\* To whom correspondence should be addressed. E-mail: [yylong@ciac.ac.cn](mailto:yylong@ciac.ac.cn)

<sup>a</sup> Jilin Business and Technology College

<sup>b</sup>State Key Laboratory of Polymer Physics and Chemistry, Changchun Institute of Applied Chemistry

## 1. General information about the content and triads calculation of poly(ethylene-*co*-1-hexene)

In this work, we are primarily concerned with substitutional isomerisms of the sequence type of poly(ethylene-*co*-1-hexene), which are the result of adding either an ethylene or 1-hexene monomer unit to the end of a growing polymer chain, whereas the previous monomer unit added is either ethylene or 1-hexene.<sup>1-5</sup> The common way to describe these sequences is by means of *n*-ads, namely monads (one monomer unit), diads (two monomer units), triads, etc. The sum of the mole fractions of the two monads in the poly(ethylene-*co*-1-hexene) system, ethylene (E) and 1-hexene (H) is unity, i.e.,  $[E] + [H] = 1$ . In the same way, six triads are possible (EEE, EEH, HEH, EHE, EHH, HHH), and the sum of their mole fractions is unity. It is easily seen that  $[EEE] + [EEH] + [HEH] = [E]$ , and  $[HHH] + [EHH] + [EHE] = [H]$ .<sup>6</sup> In addition, it is required that the necessary relationship  $[EEH] + 2[HEH] = [EHH] + 2[EHE]$  is maintained.

The chemical shift assignments of the  $^{13}\text{C}$  NMR spectrum of poly(ethylene-*co*-1-hexene) were well reported in the literature, with essentially full agreement among independent reports. For the purpose of determining triads mole fractions, Hsieh and Randall introduced the concept of collective assignments with the  $^{13}\text{C}$  NMR spectrum, in which the spectrum was divided into baseline-resolved regions and then integrated region by region,<sup>7-8</sup> as shown in **Table S2**. The integrated intensities of the various collective assignment regions (A-G) can be related algebraically, in many ways, to the content of the six different triads in EH copolymer. Considering that the long  $T_1$  value of methyl carbons in the region H required long repetition delays, we choose the following equations for the determination of triads mole fractions:  $k[EHE] = B$ ,  $k[EEH] = E$ ,  $k[HEH] = F$ ,  $k[EHH] = 2(G - A - B)$ ,  $k[HHH] = 2A + B - G$ ,  $k[EEE] = 0.5D - 0.5G - 0.25E$ . Notably, almost all the signals correlated with the equations are ascribed to  $\text{CH}_2$  carbons, except the resonance in region B assignable to CH carbon. In addition, the ethylene/1-hexene copolymer used here are LLDPE (1-hexene incorporation  $\leq 10$  mol %) without HH sequences ( $S_{\alpha\alpha}$ ), since no signal in region A are detected. The equation of  $k[EHE] = 0.5E + F$  then can be deduced from the expression  $[EEH] + 2[HEH] = [EHH] + 2[EHE]$ . Consequently, the factor of the degree of the substitution on the accuracy of triad mole fractions is almost to the same extent.

## Reference:

1. F. A. Bovey, *High-Resolution NMR of Macromolecules*; Academic Press: New York, 1972.
2. F. A. Bovey, *Polymer Conformation and Configuration*; Academic Press: NY, 1969.
3. F. A. Bovey, *High-Resolution NMR of Macromolecules*; Academic Press: New York, 1979.
4. J. C. Randall, *Polymer Sequence Determination*; Academic Press: New York, 1977.
5. D. E. Axelson, G. C. Levy, L. Mandelkern, *Macromolecules* 1979, **12**, 41–52.
6. J. C. Randall, *J Macromol. Sci., Rev. Macromol. Chem. Phys.* 1989, **C29**, 201–317.
7. E. T. Hsieh, J. C. Randall, *Macromolecules* 1982, **15**, 1402–1406.
8. H. Merkle, H. Wei, M. Garwood, K. Uğurbil, *J. Magn. Reson.* 1992, **99**, 480–494.

**Table S1** Composition and monomer sequence distributions of the two model EH samples calculated by quantitative  $^{13}\text{C}$  NMR.

| Sample ID | NMR method          | Time(min) | Mole fraction (%) |          | Monomer sequence distributions |         |      |
|-----------|---------------------|-----------|-------------------|----------|--------------------------------|---------|------|
|           |                     |           | ethylene          | 1-hexene | EEE                            | EEH+HEE | EHE  |
| EH-1      | $^{13}\text{C}$ NMR | 1390      | 91.40             | 8.60     | 74.20                          | 17.20   | 8.60 |
| EH-2      | $^{13}\text{C}$ NMR | 1140      | 95.92             | 4.08     | 87.76                          | 8.16    | 4.08 |

**Table S2**  $^{13}\text{C}$  chemical shift assignments for the poly(ethylene-*co*-1-hexene), as determined by Hsieh and Randall

| region | $^{13}\text{C}$ chemical shift range (ppm) | Carbon types                      | Contributing n-ads |
|--------|--------------------------------------------|-----------------------------------|--------------------|
| A      | 39.5-42.0                                  | $\text{CH}_2$ ( $\alpha\alpha$ )  | HHHH, HHHE, EHHE   |
| B      | 38.0                                       | CH (EHE)                          | EHE                |
| C      | 35.64                                      | CH (EHH)                          | EHH                |
|        | 34.7-34.9                                  | $\text{CH}_2$ ( $\alpha\gamma$ )  | EEH,EHE, HEH       |
|        | 34.40                                      | $\text{CH}_2$ ( $\alpha\delta+$ ) | EHEE               |
|        | 34.00                                      | $\text{CH}_2$ (4B <sub>4</sub> )  | EEH, HEH, EHE, HHE |
| D      | 30.79                                      | $\text{CH}_2$ ( $\gamma\gamma$ )  | HEEH               |
|        | 30.33                                      | $\text{CH}_2$ ( $\gamma\delta+$ ) | EEEH               |
|        | 29.84                                      | $\text{CH}_2$ ( $\delta\delta$ )  | EEEE               |
|        | 29.40                                      | $\text{CH}_2$ (3B <sub>4</sub> )  | EHE                |
|        | 29.21                                      | $\text{CH}_2$ (3B <sub>4</sub> )  | HEH                |
| E      | 27.0-27.16                                 | $\text{CH}_2$ ( $\beta\delta+$ )  | EEH, EHE           |
| F      | 24.40                                      | $\text{CH}_2$ ( $\beta\beta$ )    | EHE, HEH           |
| G      | 23.26                                      | $\text{CH}_2$ (2B <sub>4</sub> )  | EEH, HEH, EHE, HHE |
| H      | 14.12                                      | $\text{CH}_3$ (1B <sub>4</sub> )  | EEH, HEH, EHE, HHE |

**Table S3.** Repeatability of 2D HSQC with NUS for Sample EH-1 and EH-2.

| Sample       |            | EH-1   |       |       |         |       | EH-2   |       |       |         |       |
|--------------|------------|--------|-------|-------|---------|-------|--------|-------|-------|---------|-------|
| method       | evaluation | triads |       |       | content |       | triads |       |       | content |       |
|              |            | EEE    | EEH   | EHE   | E       | H     | EEE    | EEH   | EHE   | E       | H     |
| HSQC/NUS 25% | mean       | 0.880  | 0.080 | 0.040 | 0.960   | 0.040 | 0.748  | 0.168 | 0.084 | 0.916   | 0.084 |
|              | SD         | 0.005  | 0.005 | 0.005 | 0.005   | 0.005 | 0.005  | 0.006 | 0.006 | 0.005   | 0.006 |
|              | CV%        | 0.57   | 6.25  | 12.5  | 0.63    | 12.5  | 0.67   | 3.57  | 7.14  | 0.55    | 7.14  |
| HSQC/NUS 35% | mean       | 0.877  | 0.082 | 0.041 | 0.959   | 0.041 | 0.742  | 0.172 | 0.086 | 0.914   | 0.086 |
|              | SD         | 0.003  | 0.003 | 0.003 | 0.003   | 0.003 | 0.003  | 0.004 | 0.004 | 0.004   | 0.004 |
|              | CV%        | 0.34   | 3.66  | 7.32  | 0.31    | 7.32  | 0.40   | 2.33  | 4.65  | 0.44    | 4.65  |
| HSQC/NUS 50% | mean       | 0.877  | 0.082 | 0.041 | 0.959   | 0.041 | 0.745  | 0.170 | 0.085 | 0.915   | 0.085 |
|              | SD         | 0.002  | 0.002 | 0.002 | 0.002   | 0.003 | 0.001  | 0.002 | 0.002 | 0.002   | 0.002 |
|              | CV%        | 0.22   | 2.42  | 4.86  | 0.20    | 4.86  | 0.14   | 1.18  | 2.36  | 0.22    | 2.36  |
| HSQC/NUS 75% | mean       | 0.874  | 0.084 | 0.042 | 0.958   | 0.042 | 0.742  | 0.172 | 0.086 | 0.914   | 0.086 |
|              | SD         | 0.002  | 0.003 | 0.003 | 0.002   | 0.003 | 0.002  | 0.003 | 0.003 | 0.002   | 0.003 |

|  |     |      |      |      |      |      |      |      |      |      |      |
|--|-----|------|------|------|------|------|------|------|------|------|------|
|  | CV% | 0.22 | 3.50 | 7.00 | 0.20 | 7.00 | 0.27 | 1.74 | 3.48 | 0.22 | 3.48 |
|--|-----|------|------|------|------|------|------|------|------|------|------|

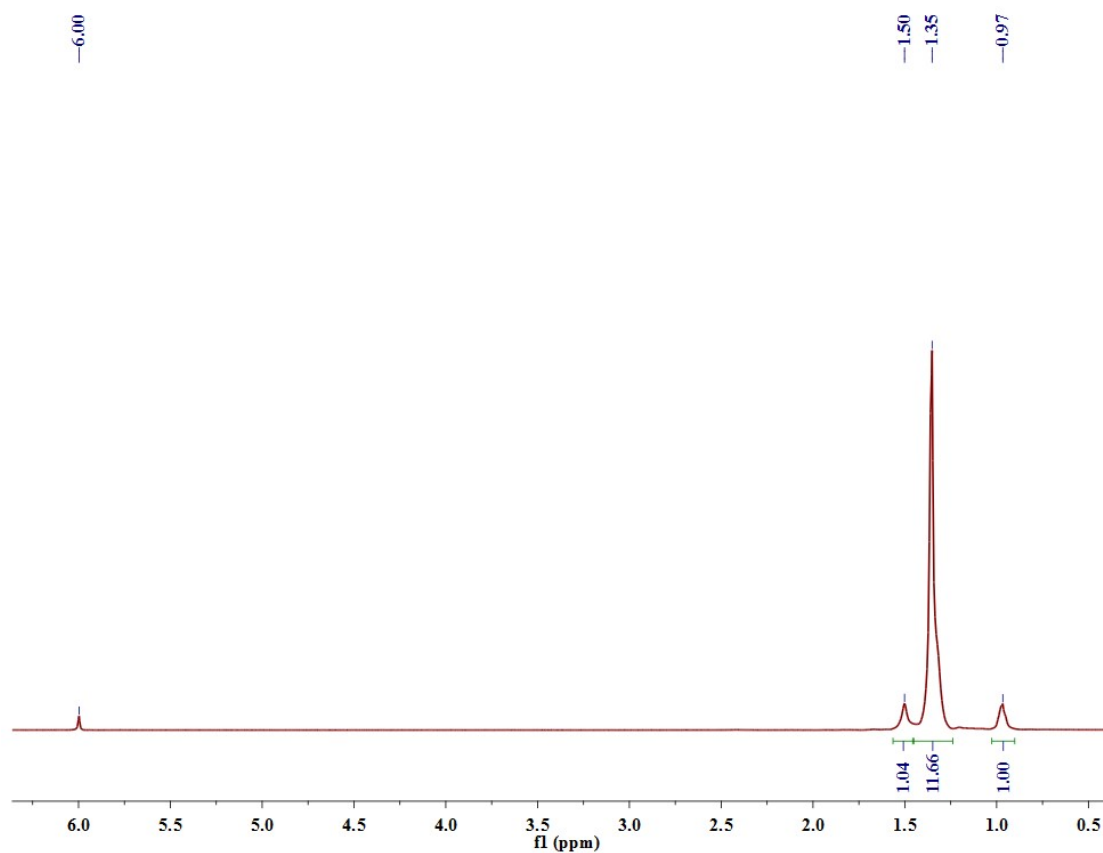

**Fig. S1.** Liquid-state  $^1\text{H}$  NMR spectrum ( 400.13 MHz) of EH-1 sample dissolved in 1, 1, 2, 2-tetrachloroethane- $\text{d}_4$  at  $120^\circ\text{C}$  with  $D_1 = 10$  s and  $\text{NS} = 64$ .

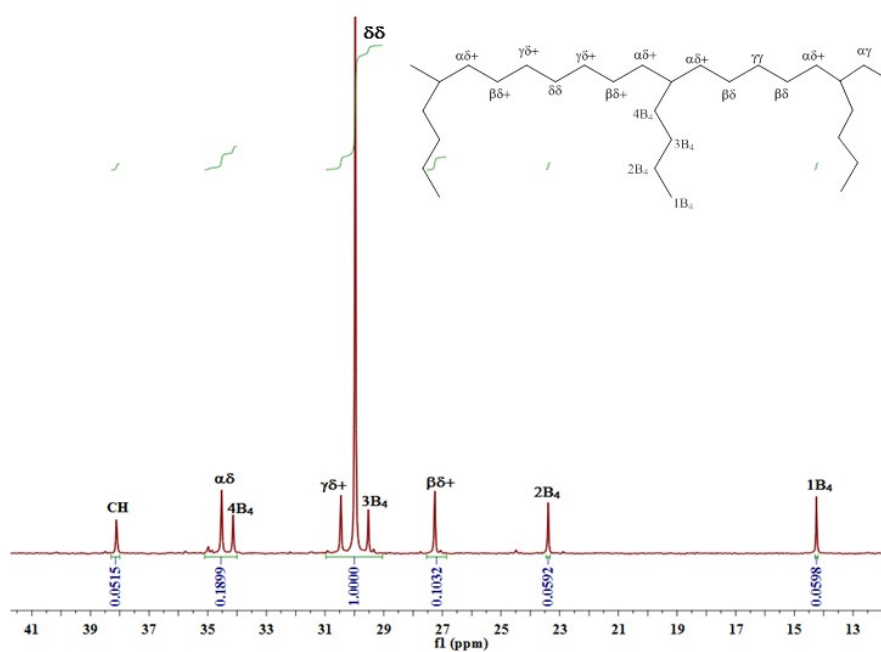

**Fig. S2.** Liquid-state  $^1\text{H}$  NMR spectrum (a, 400.13 MHz) and  $^{13}\text{C}$  NMR spectrum (b, 100.19 MHz) of EH-1 sample dissolved in 1, 1, 2, 2-tetrachloroethane- $\text{d}_4$  at  $120^\circ\text{C}$  (with WALTZ-16 decoupling) with  $D_1 = 42$  s and  $\text{NS} = 1900$ .

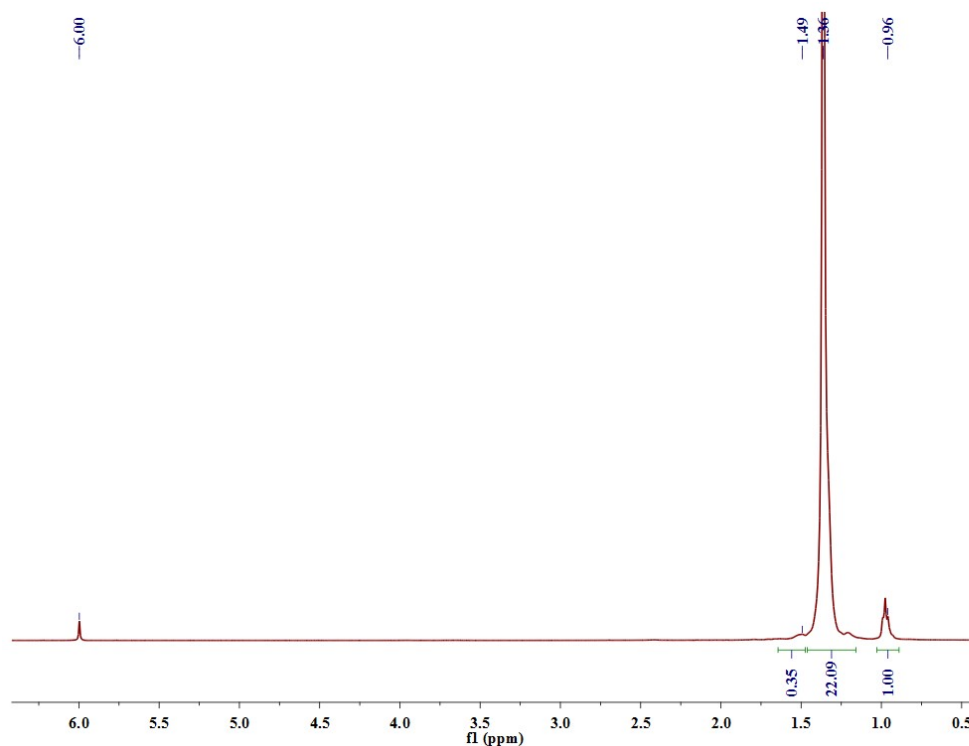

**Fig. S3.** Liquid-state  $^1\text{H}$  NMR spectrum ( 400.13 MHz) of EH-2 sample dissolved in 1, 1, 2, 2-tetrachloroethane- $\text{d}_4$  at 120°C with  $D_1 = 10$  s and NS = 64.

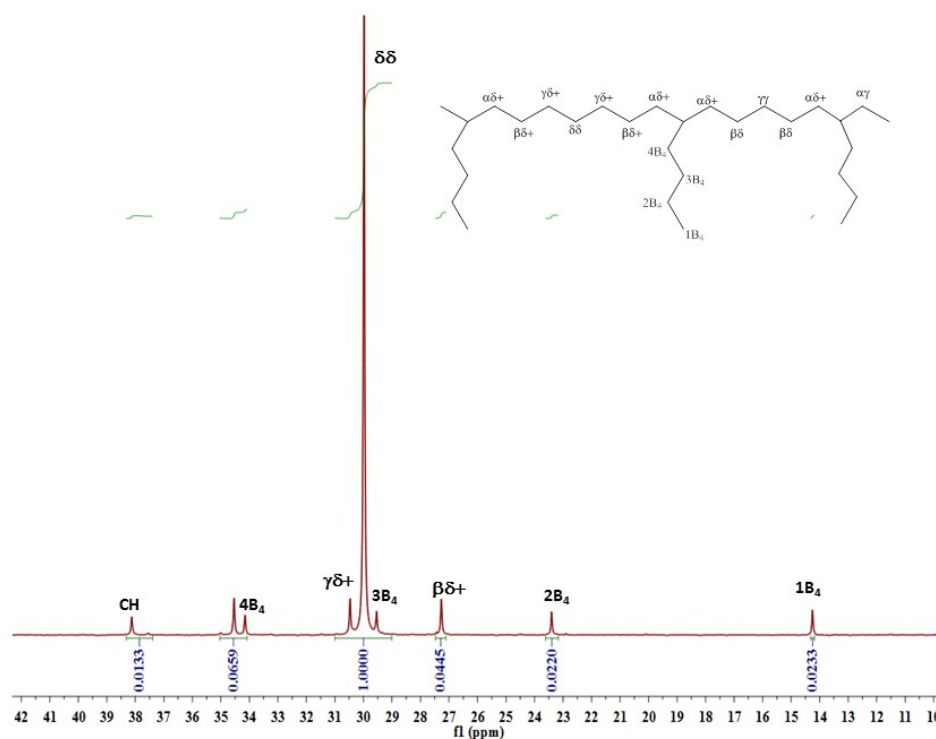

**Fig. S4.** Liquid-state  $^{13}\text{C}$  NMR spectrum (101MHz) of EH-2 sample dissolved in 1, 1, 2, 2-tetrachloroethane- $\text{d}_4$  at 120°C (with WALTZ-16 decoupling) with  $D_1 = 42$  s and NS = 1500.

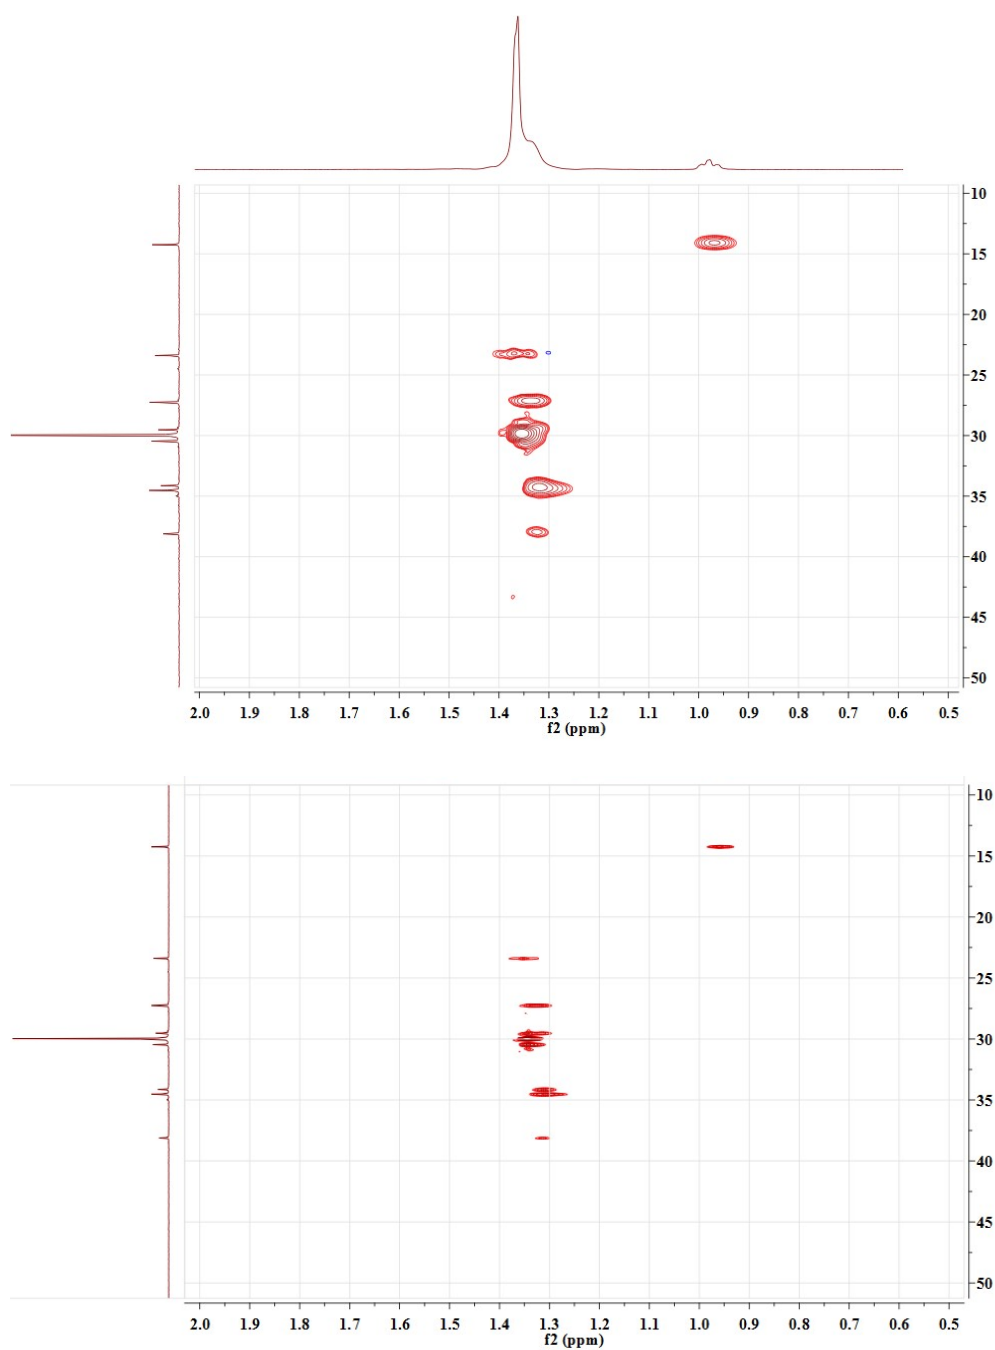

**Fig. S5.** Comparison of 2D HSQC spectra of EH-2 sample recorded on 400MHz Bruker spectrometer, with  $\text{TD} = 128$  (top) and  $\text{TD} = 512$  (bottom) in  $F_1$ , respectively.
